# Supplementary material for: Structural and oxygen binding properties of dimeric horse myoglobin
Source: Royal Society of Chemistry journal article supplement (doi:10.1039/c2dt30893b), 2012-01-01
Supplement: c2dt30893b.pdf [file c2dt30893b.pdf]

## Supporting Information

### Structural and Oxygen Binding Properties of Dimeric Horse Myoglobin

Satoshi Nagao,<sup>a</sup> Hisao Osuka,<sup>‡a</sup> Takuya Yamada,<sup>a</sup> Takeshi Uni,<sup>a</sup> Yasuhito Shomura,<sup>bc</sup> Kiyohiro Imai,<sup>d</sup>  
Yoshiki Higuchi<sup>\*bc</sup> and Shun Hirota<sup>\*a</sup>

<sup>a</sup> Graduate School of Materials Science, Nara Institute of Science and Technology, 8916-5, Takayama, Ikoma, Nara 630-0192, Japan;  
E-mail: hirota@ms.naist.jp

<sup>b</sup> Department of Life Science, Graduate School of Life Science, University of Hyogo, 3-2-1 Koto, Kamigori-cho, Ako-gun, Hyogo 678-1297, Japan; E-mail: hig@sci.u-hyogo.ac.jp

<sup>c</sup> RIKEN SPring-8 Center, 1-1-1 Koto, Sayo-cho, Sayo-gun, Hyogo 679-5148, Japan

<sup>d</sup> Department of Frontier Bioscience, Faculty of Bioscience and Applied Chemistry, Hosei University, 3-7-2 Kajino-cho, Koganei, Tokyo 184-8584, Japan

<sup>‡</sup>Present address: Department of Life Science, Graduate School of Life Science, University of Hyogo, 3-2-1 Koto, Kamigori-cho, Ako-gun, Hyogo 678-1297, Japan

## Table of Contents

|    |                  |                                                                                                        |    |
|----|------------------|--------------------------------------------------------------------------------------------------------|----|
| 1. | <b>Table S1</b>  | Statistics of data collection and structure refinement.                                                | S2 |
| 2. | <b>Table S2</b>  | Root-mean-square deviation values between the structures of the monomer and each independent protomer. | S4 |
| 3. | <b>Figure S1</b> | Elution curves of horse metMb.                                                                         | S5 |
| 4. | <b>Figure S2</b> | Crystal structure of dimeric horse Mb with an electron density map of the heme.                        | S6 |
| 5. | <b>Figure S3</b> | Hill plots of monomeric and dimeric horse Mbs for oxygen binding.                                      | S7 |

**Table S1** Statistics of data collection and structure refinement.

| Data collection                                     |                     |                 |
|-----------------------------------------------------|---------------------|-----------------|
| X-ray source                                        | SPring-8 (BL44XU)   |                 |
| Wavelength (Å)                                      | 0.800               |                 |
| Space group                                         | $P2_12_12_1$        |                 |
| Unit cell parameters                                |                     |                 |
| $a, b, c$ (Å)                                       | 57.3, 62.5, 83.4    |                 |
| Resolution (Å)                                      | 20-1.05 (1.07-1.05) |                 |
| Total reflections                                   | 601280              |                 |
| Number of unique reflections                        | 139129 (6909)       |                 |
| $R_{\text{merge}}^{\text{a}}$                       | 0.065 (0.450)       |                 |
| Completeness (%)                                    | 100.0 (99.5)        |                 |
| $\langle I/\sigma(I) \rangle$                       | 13.2 (3.1)          |                 |
| Redundancy                                          | 4.3 (3.5)           |                 |
| Refinement                                          |                     |                 |
| Resolution (Å)                                      | 20-1.05             |                 |
| Number of reflections                               | 133007              |                 |
| $R_{\text{cryst}}^{\text{b}}$ (%) ( $F > 0\sigma$ ) | 12.8                |                 |
| $R_{\text{free}}^{\text{b}}$ (%)                    | 16.8                |                 |
| Number of observations per parameter                | 4.5                 |                 |
| Number of atoms in an asymmetric unit               |                     |                 |
| Protein                                             | 2398                |                 |
| Water                                               | 639                 |                 |
| Heme                                                | 86                  |                 |
| Deviations from ideal geometry                      | RMSD                | target $\sigma$ |
| Bond distance (Å)                                   | 0.014               | 0.020           |
| Angle distances (Å)                                 | 0.030               | 0.040           |
| Chiral volumes (Å <sup>3</sup> )                    |                     |                 |
| C sp <sup>3</sup>                                   | 0.078               | 0.100           |
| C sp <sup>2</sup>                                   | 0.088               | 0.100           |

|                                     |       |                 |
|-------------------------------------|-------|-----------------|
| Anisotropic displacement parameters | RMSD  | target $\sigma$ |
| DELU ( $\text{\AA}^2$ )             | 0.005 | 0.010           |
| SIMU ( $\text{\AA}^2$ )             | 0.046 | 0.135           |
| ISOR ( $\text{\AA}^2$ )             | 0.098 | 0.100           |

  

|                                    |      |
|------------------------------------|------|
| Mean isotropic equivalent B-factor |      |
| ( $\text{\AA}^2$ )                 |      |
| Main-chain atoms                   | 11.5 |
| Side-chain atoms                   | 19.8 |
| Heme atoms                         | 9.8  |
| Water atoms                        | 28.8 |

  

|                       |      |
|-----------------------|------|
| Ramachandran plot (%) |      |
| Favored               | 97.7 |
| Allowed               | 2.3  |

Statistics for the highest-resolution shell are given in parentheses.

<sup>a</sup>  $R_{\text{merge}} = \frac{\sum_{\text{hkl}} |I - \langle I \rangle|}{(\sum_{\text{hkl}} I)^{-1}}$ .

<sup>b</sup>  $R_{\text{cryst}} = \frac{\sum_{\text{hkl}} |F_{\text{obs}} - k F_{\text{calc}}|}{(\sum_{\text{hkl}} F_{\text{obs}})^{-1}}$ ,  $k$ : scaling factor.  $R_{\text{free}}$  was computed identically, except where all reflections belong to a test set of 5% of randomly selected data.

**Table S2** Root-mean-square deviation (rmsd) values of the 1–77 amino acid and the 86–153 amino acid regions between the structures of the monomer and each independent protomer.

|                                                       | 1–77 Amino acid residues | 86–153 Amino acid residues |
|-------------------------------------------------------|--------------------------|----------------------------|
| Between the protomers (Å)                             | 0.68                     | 0.38                       |
| Between the monomer and each independent protomer (Å) | 0.56, 0.77               | 1.20, 1.22                 |

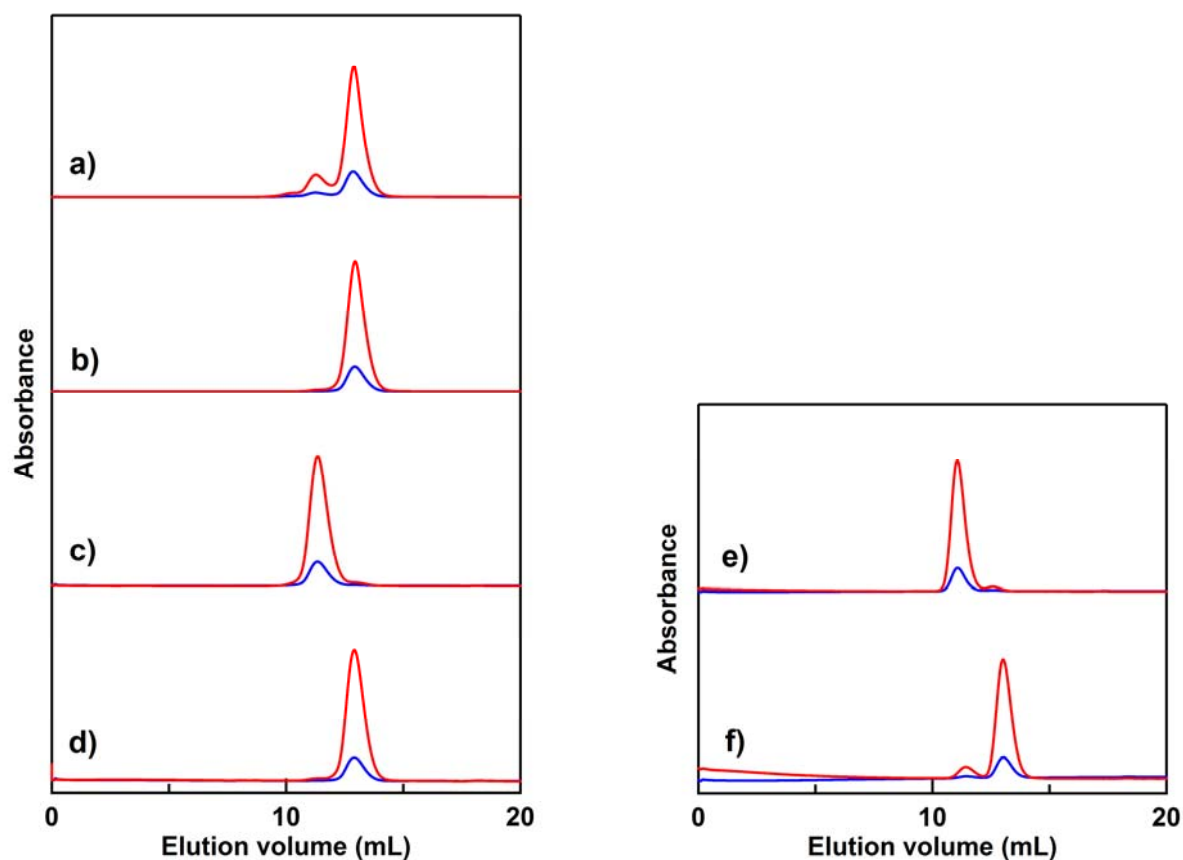

**Figure S1** Elution curves of horse metMb. a) Elution curve after incubation under 5% (v/v) ethanol, subsequent lyophilization, and dissolution to buffer; b) elution curve of purified monomeric metMb; c) elution curve of purified dimeric metMb; d) elution curve of dimeric metMb after incubation at pH 7.0 for 5 min at 70°C; e) elution curve of dimeric metMb after incubation at pH 7.0 for 3 days at 4°C; f) elution curve of dimeric metMb after incubation at pH 5.0 for 15 min at 4°C. Measurement conditions: column: Superdex 75 10/300 GL; flow rate: 0.2 mL/min; monitoring wavelength: 409 (red) and 280 nm (blue); solvent: 50 mM potassium phosphate buffer; pH: 7.0; temperature: 5 °C.

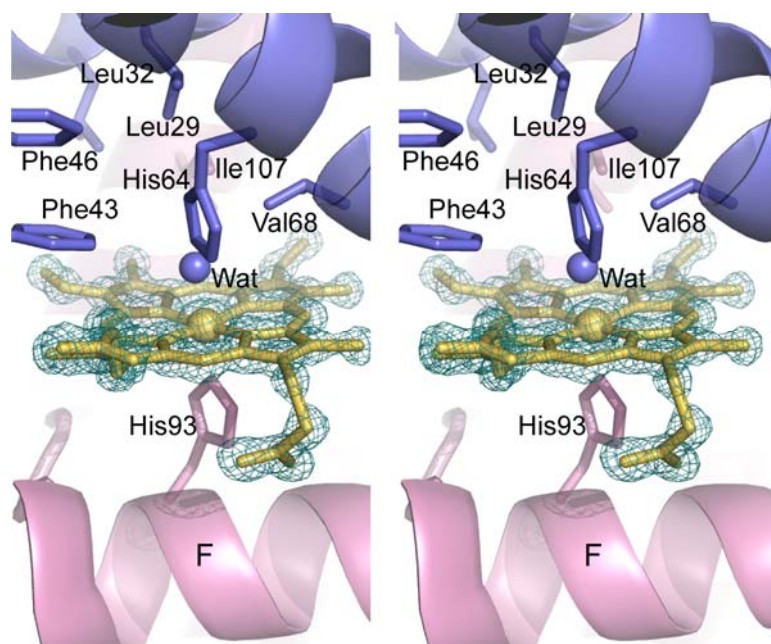

**Figure S2** Crystal structure of dimeric horse Mb with a  $2F_o - F_c$  omit electron density map of the heme. The Heme is shown as a yellow stick model. The  $2F_o - F_c$  electron density map is contoured at  $2\sigma$  and shown as a green mesh. Side-chain atoms of His64 and His93 (labeled as H64 and H93) and amino acids in the heme pocket are shown as stick models with labels.

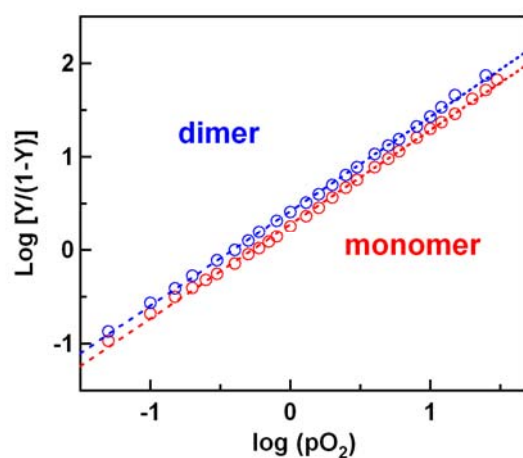

**Figure S3** Hill plots of monomeric and dimeric horse Mbs for oxygen binding.  $pO_2$  and  $Y$  represent the partial oxygen pressure (mmHg) and the fractional oxygen saturation of Mb, respectively. Best-fitted linear lines are indicated by broken lines for monomeric (red) and dimeric (blue) Mbs. Measurement conditions are the same as those in Fig. 6.
